# Supplementary material for: A synergistic dual-mode biosensor for methotrexate detection leveraging FRET and Ag NP-based UV absorption
Source: Royal Society of Chemistry journal article supplement (doi:10.1039/d5ra08792a), 2026-01-01
Supplement: d5ra08792a1.pdf [file d5ra08792a1.pdf]

## 12 **Materials and Reagents**

13 All oligonucleotides (sequences provided in Table S1) were synthesized and purified by Hippo  
14 Biotechnology Co., Ltd. (Zhejiang, China). Methotrexate (MTX), Ampicillin, (R)-Omeprazole,  
15 Simvastatin, Glucose, Aminopterin, Pemetrexed, and Folic acid were supplied by Yuanye  
16 Biotechnology Co., Ltd. (Shanghai, China). AgNO<sub>3</sub>, NaCl, KBH<sub>4</sub>, HCl, NaOH, MgCl<sub>2</sub>, MOPS, and  
17 phosphate-buffered saline (PBS; 137 mM NaCl, 10 mM phosphate, 2.7 mM KCl, pH 7.4) were  
18 obtained from Sigma-Aldrich (St. Louis, MO, USA). All working solutions were prepared in MOPS  
19 buffer (10 mM MOPS, 100 mM NaCl, 2.5 mM MgCl<sub>2</sub>, pH 7.6). All reagents were of analytical  
20 grade or higher and stored at 4 °C prior to use.

## 21 **Instrument**

22 UV-vis absorption and fluorescence spectra were acquired using a Shimadzu UV-1800  
23 spectrophotometer and a Hitachi FL-2500 fluorescence photometer, respectively. Ag NPs were  
24 characterized by high-resolution transmission electron microscopy (HR-TEM, JEOL Co., Japan) at  
25 200 kV. X-ray photoelectron spectroscopy (XPS) analysis was performed on an AXIS SUPRA+  
26 spectrometer (Shimadzu, UK). Circular Dichroism (CD) Spectroscopy analysis was performed on  
27 a J-810 CD spectrometer (JASCO, Japan). Particle size distribution was determined using a dynamic  
28 light scattering (DLS) instrument (NS-90Z Plus, Malvern Panalytical, China). Polyacrylamide gel  
29 images were captured with a Tanon 5200 dual-color fluorescence imaging system (Beijing, China).  
30 Sample incubation was conducted in an MB-102 constant-temperature metal bath shaker  
31 (Hangzhou, China).

## 32 **Synthesis of Ag NPs**

33 Ag NPs were synthesized according to a previously reported procedure with minor  
34 modifications [1]. Prior to synthesis, all glassware was thoroughly cleaned with aqua regia (3:1  
35 HCl/HNO<sub>3</sub>) and rinsed extensively with Milli-Q water. In brief, 500 mL of an aqueous solution  
36 containing 0.25 mM AgNO<sub>3</sub> and 0.25 mM trisodium citrate was vigorously stirred, followed by  
37 rapid addition of 1 mL of freshly prepared 0.5% NaBH<sub>4</sub>. The reaction proceeded under stirring for  
38 30 min, during which the solution turned yellow, indicating Ag NPs formation. The resulting colloid  
39 was filtered through a 0.22 μm membrane and stored at 4 °C.

## 40 **P1 Strand Information**

41 The P1 strand used in this study corresponds to the HMX38 aptamer sequence reported by He  
42 et al. [2], which was selected via a library-immobilized capillary systematic evolution of ligands by  
43 exponential enrichment (C-SELEX) strategy and exhibits specific binding affinity toward MTX.

## 44 **Preparation of the PMB Complex**

45 The PMB complex was formed by incubating 30 μL of streptavidin-coated magnetic beads (10  
46 mg/mL) with 30 μL of biotinylated P1 (50 μM) in 200 μL of MOPS buffer under gentle shaking at  
47 room temperature for 30 min. The beads were subsequently washed three times under magnetic  
48 separation to remove unbound strands and resuspended in 300 μL of MOPS buffer. The final  
49 complex was stored at 4 °C until further use.

## 50 **Dual-Mode Sensing Analysis of MTX**

51 First, 10 μL of streptavidin-coated magnetic beads (5 mg/mL) was mixed with 10 μL of  
52 biotinylated P1 (10 μM) in 100 μL of MOPS buffer. The mixture was incubated at room temperature  
53 under gentle shaking for 30 min to form the PMB complex. After magnetic separation, unbound P1  
54 was removed, and the beads were washed three times. The resulting complex was resuspended in  
55 200 μL of MOPS buffer and stored at 4 °C for further use. Subsequently, 10 μL of 30 μM P2 was

56 added to the PMB complex and incubated at 37 °C for 50 min. Then, 4 µL of 5 mg/mL Ag NPs was  
 57 introduced and further incubated at 25 °C in the dark for 45 min to facilitate Ag-S bond formation  
 58 between Ag NPs and the P2 strand, yielding the PMBP complex. After adding varying  
 59 concentrations of MTX to the PMBP solution and incubating at 37 °C for 50 min, magnetic  
 60 separation was performed. The supernatant containing P2-Ag NPs and the sediment were collected  
 61 separately. Finally, 200 µL of the sediment and the supernatant was analyzed using a fluorometer  
 62 (excitation: 460 nm; emission: 480-600 nm; slit widths: 5 nm for both excitation and emission)  
 63 along with UV absorption measurements, respectively.

#### 64 **Selectivity Assessment**

65 To evaluate the selectivity of the sensing platform, 5 µL of each potential interferent-including  
 66 100 µM Ampicillin, (R)-Omeprazole, Simvastatin, Glucose, Folic acid, and MTX, as well as a  
 67 mixture containing all these compounds-was separately added to individual PMBP complex  
 68 systems. Each mixture was incubated at 37 °C for 50 min. All subsequent sample preparation and  
 69 detection steps were consistent with the dual-mode sensing procedure described above.

#### 70 **Fluorescence Lifetime & FRET Parameter Measurement**

71 Fluorescence lifetime measurements and FRET parameter determination were performed using  
 72 a Fluorolog-3 fluorescence spectrometer (Horiba, Japan). To specifically probe the FRET process,  
 73 the donor fluorophore (FAM) was excited at 490 nm, and its emission was monitored at 520 nm.  
 74 The fluorescence decay curves were recorded in time-correlated single photon counting (TCSPC)  
 75 mode. These decay profiles provided the direct data for calculating the donor lifetime in both the  
 76 presence and absence of the acceptor, which is essential for determining FRET efficiency and the  
 77 subsequent donor-acceptor distance.

78 **Table S1** DNA sequences (5' -3' ) utilized in this work

| Strand | Sequence (5' -3' )                                     |
|--------|--------------------------------------------------------|
| P1     | Biotin-CTCTCGGGCGAACGCGGGATGTTTGGGGGACCCACGTTCGCCC-FAM |
| P2     | BHQ-CGTTTCGCCCCGAGAG-SH                                |

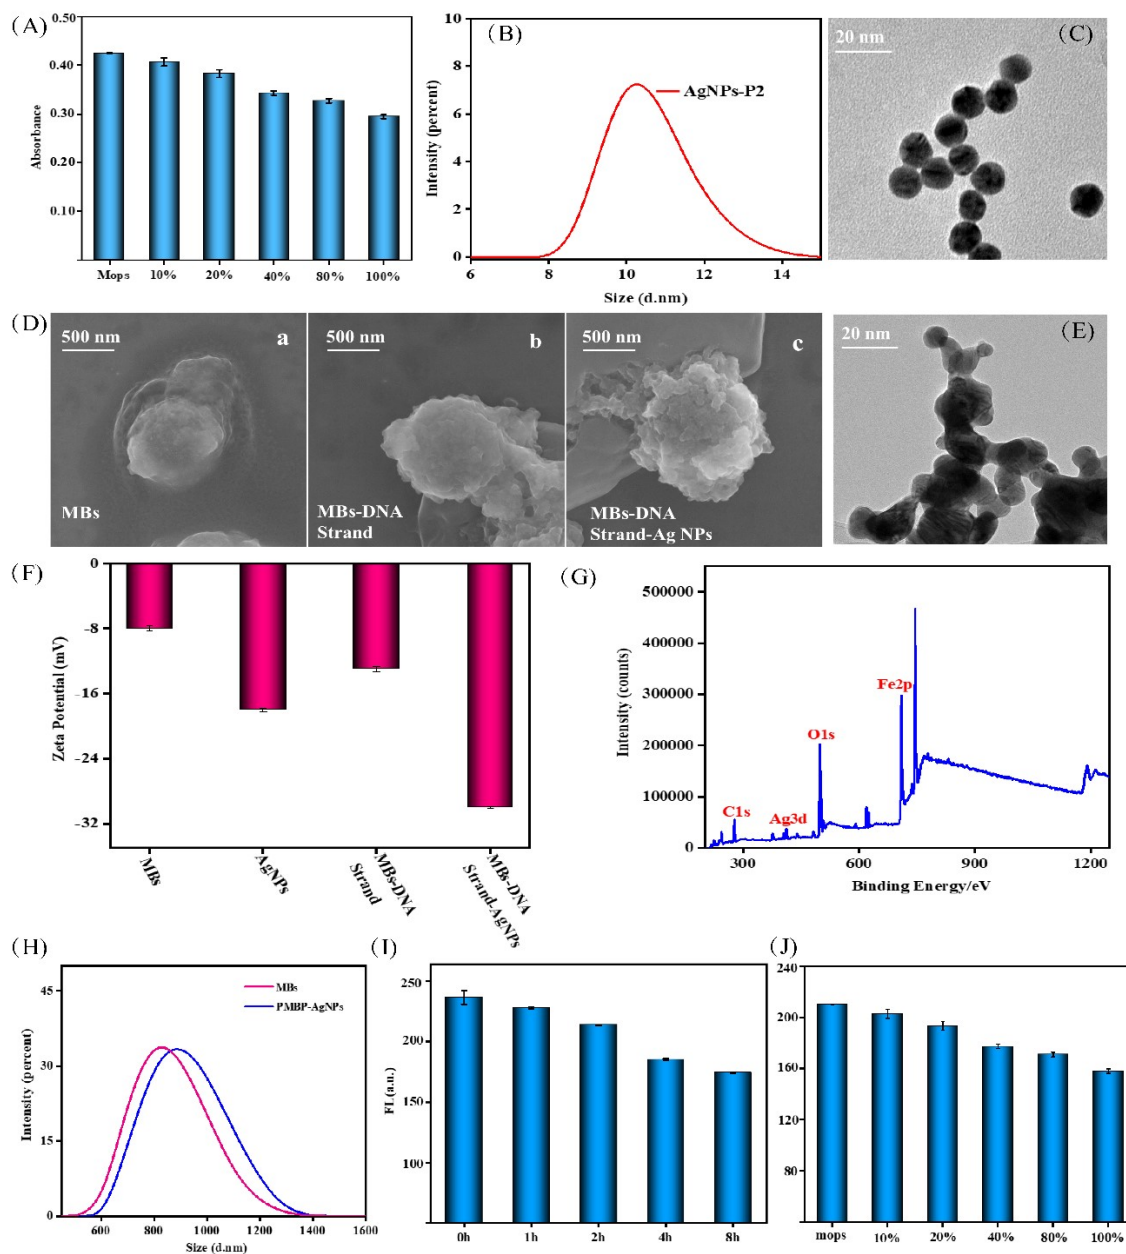

79

80 Figure S1. Characterization of silver nanomaterials and the PMBP probe. (A) Stability of silver  
81 nanomaterials in diluted human serum.(B) Dynamic light scattering (DLS) profile of P2 strand-  
82 modified silver nanomaterials.(C, E) Transmission electron microscopy (TEM) images of Ag NPs-  
83 P2 complexes before (C) and after (E) MTX addition, respectively.(D) TEM image of the intact  
84 PMBP probe (magnetic bead-P1-P2-Ag NPs complex).(F) Zeta potential profile of the intact PMBP  
85 probe.(G) X-ray photoelectron spectroscopy (XPS) spectrum of the intact PMBP probe.(H) DLS  
86 profile of the intact PMBP probe.(I) Time stability of the intact PMBP probe.(J) Stability of the  
87 intact PMBP probe in in diluted human serum. Data represent means  $\pm$  SD. (n=5)

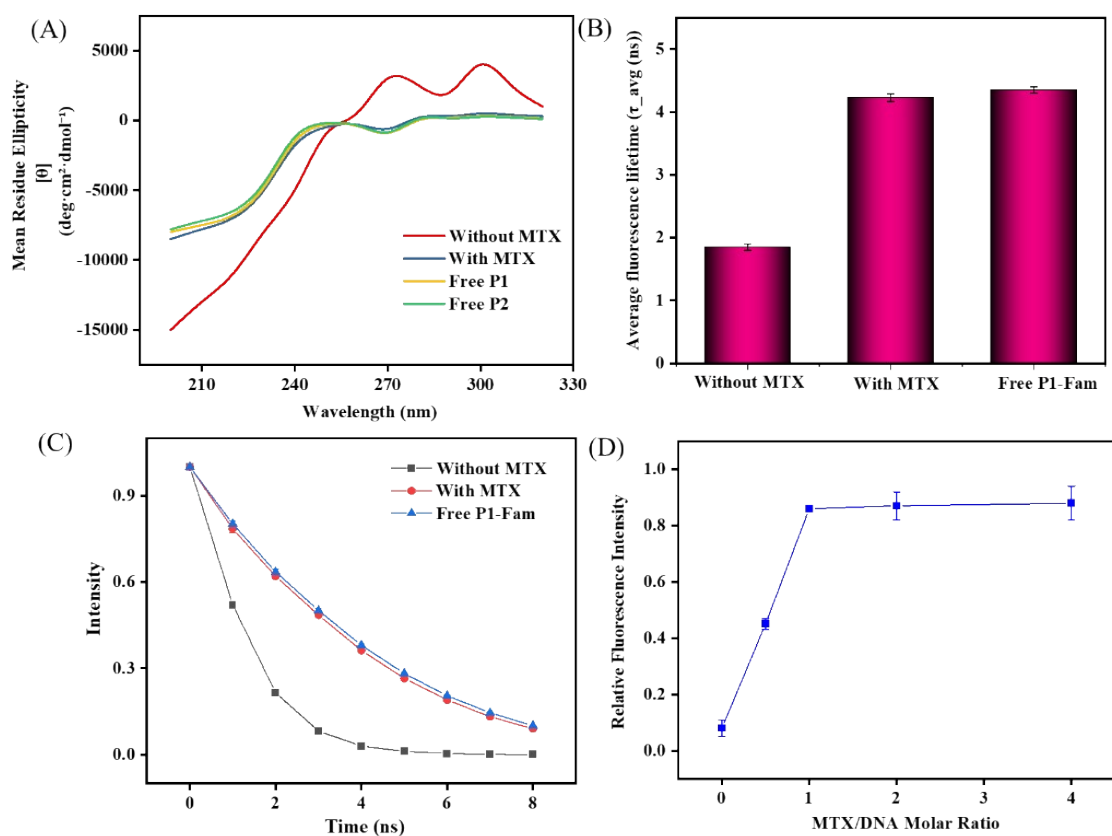

88

89 Figure S2. Validation of the FRET process. (A) Circular dichroism (CD) spectra of DNA strands  
 90 before and after MTX binding. (B, C) Fluorescence lifetime measurements for DMSP process. (D)  
 91 Optimization of the molar ratio between aptamer P1 and MTX. Data represent means  $\pm$  SD. (n=4)

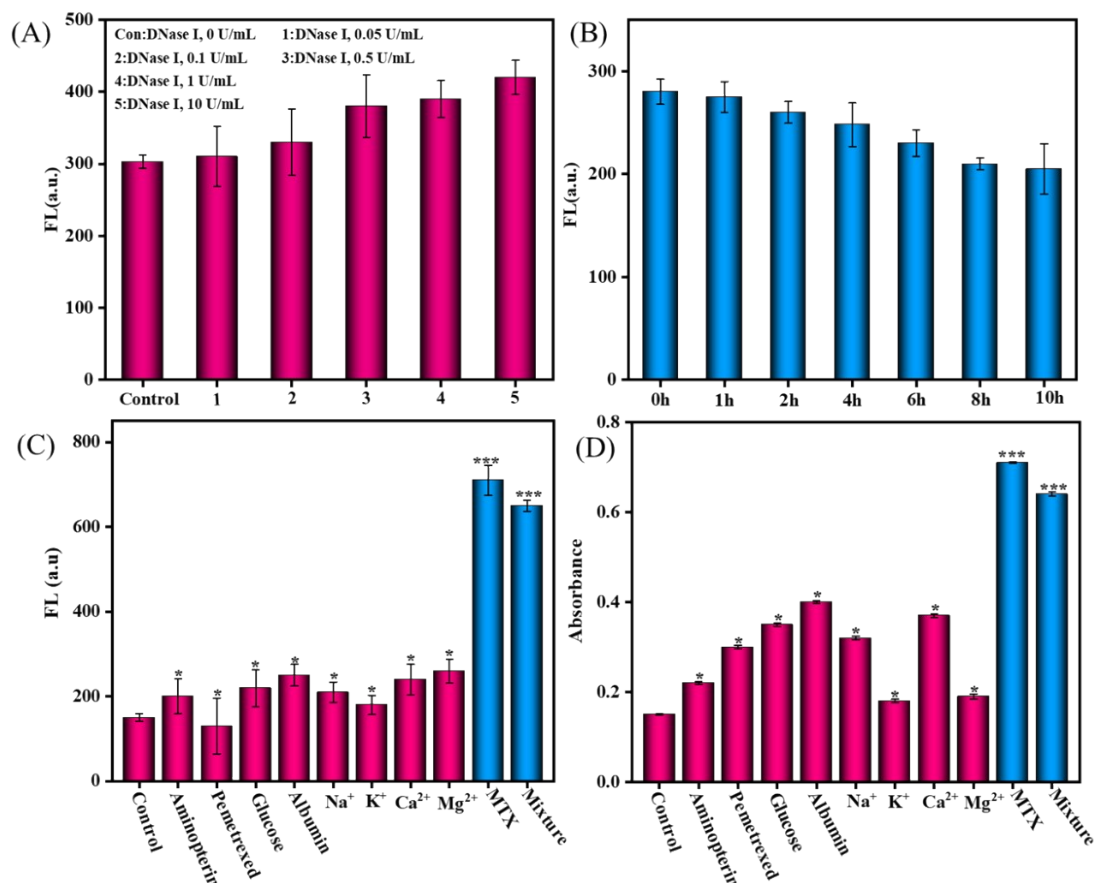

92

93 Figure S3. Biological evaluation of the PMBP probe. (A) Enzyme resistance of the probe at different  
 94 enzyme concentrations. (B) Enzyme resistance of the probe over different incubation time periods.  
 95 (C) Competitive binding assay of the probe with MTX structural analogs in diluted human serum  
 96 via the fluorescence sensing mode. (D) Competitive binding assay of the probe with MTX structural  
 97 analogs in diluted human serum via the UV-Vis sensing mode. \*\*\*P ≤ 0.001 (unpaired t-test). Data  
 98 represent means ± SD. Data represent means ± SD. (n=3)

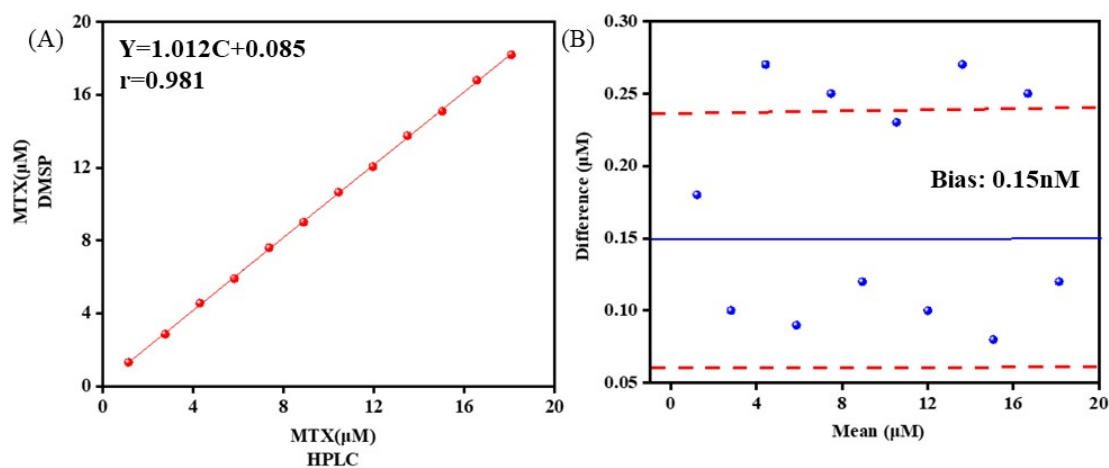

99

100 Figure S4. Comparative analysis of detection accuracy. (A, B) Correlation analysis results showing  
 101 the consistency between the proposed DMSP method and the gold standard HPLC method.

102

103 **Table S2** Recovery of MTX in human serum using the DMSP via fluorescence sensing

| Spiked ( $\mu\text{M}$ ) | Found ( $\mu\text{M}$ ) | Recovery (%) | RSD (%) |
|--------------------------|-------------------------|--------------|---------|
| 0.50                     | 0.57                    | 114.01       | 2.66    |
| 4.00                     | 3.94                    | 98.50        | 1.81    |
| 8.00                     | 8.15                    | 101.87       | 2.21    |
| 20.00                    | 21.05                   | 105.24       | 0.43    |

104 **Table S3** Precision of MTX in human serum using the DMSP via fluorescence sensing

| Spiked ( $\mu\text{M}$ ) | Intra-day Variability ( $\mu\text{M}$ ) | Intra-day RSD (%) | Inter-day Variability ( $\mu\text{M}$ ) | Inter-day RSD (%) | Inter-operator Variability ( $\mu\text{M}$ ) | Inter-operator RSD (%) |
|--------------------------|-----------------------------------------|-------------------|-----------------------------------------|-------------------|----------------------------------------------|------------------------|
| 0.50                     | 0.58                                    | 3.11              | 0.53                                    | 3.25              | 0.52                                         | 3.85                   |
| 4.00                     | 3.91                                    | 2.30              | 3.95                                    | 3.15              | 3.81                                         | 4.26                   |
| 8.00                     | 8.19                                    | 1.20              | 8.05                                    | 3.11              | 7.98                                         | 3.23                   |
| 20.00                    | 21.32                                   | 2.45              | 21.15                                   | 3.25              | 20.18                                        | 4.11                   |

105 **Table S4** Precision of MTX in human serum using the HPLC via fluorescence sensing

| Spiked ( $\mu\text{M}$ ) | Intra-day Variability ( $\mu\text{M}$ ) | Intra-day RSD (%) | Inter-day Variability ( $\mu\text{M}$ ) | Inter-day RSD (%) | Inter-operator Variability ( $\mu\text{M}$ ) | Inter-operator RSD (%) |
|--------------------------|-----------------------------------------|-------------------|-----------------------------------------|-------------------|----------------------------------------------|------------------------|
| 0.50                     | 0.56                                    | 2.80              | 0.57                                    | 4.20              | 0.55                                         | 4.85                   |
| 4.00                     | 3.92                                    | 2.30              | 3.94                                    | 3.05              | 3.89                                         | 3.85                   |
| 8.00                     | 8.12                                    | 2.20              | 8.15                                    | 3.07              | 8.08                                         | 4.22                   |
| 20.00                    | 21.02                                   | 2.45              | 21.05                                   | 3.55              | 20.98                                        | 4.50                   |

106 **Table S5** Recovery of MTX in human serum using the DMSP via UV sensing

| Spiked ( $\mu\text{M}$ ) | Found ( $\mu\text{M}$ ) | Recovery (%) | RSD (%) |
|--------------------------|-------------------------|--------------|---------|
| 0.50                     | 0.49                    | 98.03        | 0.76    |
| 8.00                     | 8.31                    | 103.85       | 1.81    |
| 20.00                    | 20.58                   | 102.92       | 0.62    |

107

108 **Table S6** Precision of MTX in human serum using the DMSP via UV sensing

| Spiked<br>( $\mu\text{M}$ ) | Intra-day<br>Variability<br>( $\mu\text{M}$ ) | Intra-day<br>RSD (%) | Inter-day<br>Variability<br>( $\mu\text{M}$ ) | Inter-day<br>RSD (%) | Inter-operator<br>Variability<br>( $\mu\text{M}$ ) | Inter-<br>operator<br>RSD (%) |
|-----------------------------|-----------------------------------------------|----------------------|-----------------------------------------------|----------------------|----------------------------------------------------|-------------------------------|
| 0.50                        | 0.43                                          | 3.33                 | 0.56                                          | 4.53                 | 0.6                                                | 5.85                          |
| 8.00                        | 8.98                                          | 3.45                 | 8.47                                          | 5.05                 | 8.49                                               | 5.57                          |
| 20.00                       | 20.78                                         | 3.25                 | 21.33                                         | 4.79                 | 21.08                                              | 4.99                          |

109 **Table S7** Precision of MTX in human serum using the HPLC via UV sensing

| Spiked<br>( $\mu\text{M}$ ) | Intra-day<br>Variability<br>( $\mu\text{M}$ ) | Intra-day<br>RSD (%) | Inter-day<br>Variability<br>( $\mu\text{M}$ ) | Inter-day<br>RSD (%) | Inter-operator<br>Variability<br>( $\mu\text{M}$ ) | Inter-<br>operator<br>RSD (%) |
|-----------------------------|-----------------------------------------------|----------------------|-----------------------------------------------|----------------------|----------------------------------------------------|-------------------------------|
| 0.50                        | 0.48                                          | 3.10                 | 0.53                                          | 4.33                 | 0.59                                               | 4.85                          |
| 8.00                        | 8.28                                          | 3.30                 | 8.94                                          | 5.05                 | 8.89                                               | 5.45                          |
| 20.00                       | 20.55                                         | 4.20                 | 21.05                                         | 4.77                 | 20.78                                              | 4.92                          |

110

111 **Reference**

- 112 (1) Beyene, H. D.; Werkneh, A. A.; Bezabh, H. K.; et al. Synthesis paradigm and applications of  
 113 silver nanoparticles (AgNPs), a review. *Sustain. Mater. Technol.* 2017, 13, 18-23.  
 114 (2) He, J.; Wang, J.; Zhang, M.; et al. Selection of a structure-switching aptamer for the specific  
 115 methotrexate detection. *ACS Sens.* 2021, 6 (6), 2436-2441.
